# Supplementary material
Source: publisher site journal article supplement (https://www.dovepress.com/get_supplementary_file.php?f=286559.xlsx)
Supplement: Supplementary file 1 [file get_supplementary_file.php]

## Sheet: Sheet1
N° Centro	COMITATI ETICI
121	Comitato Etico Fondazione Policlinico A. Gemelli - IRCCS -Università Cattolica del Sacro Cuore c/o Fondazione IRCCS Policlinico A. Gemelli Largo A. Gemelli, 8 00168 Roma	Centro coordinatore
101	Comitato Etico delle Province di Pescara e Chieti c/o Segreteria Tecnico-Amministrativa Università degli Studi G. D’Annunzio Via dei Vestini, 29B 66100 Chieti
102	Comitato Etico Unico Regionale della Basilicata c/o A.O. San Carlo Sala C - Palazzina Uffici - 1^ piano Via Potito Petrone 85100 Potenza
103	Comitato Etico Catania 2 A.O.R.N. Garibaldi Piazza Santa Maria di Gesù, 5 95124 Catania
105	Comitato Etico Seconda Università degli Studi di Napoli - A.O. SUN Ospedale dei Colli c/o Seconda Università degli Studi di Napoli Via Costantinopoli, 104 80138 NAPOLI
106	Comitato Etico Seconda Università degli Studi di Napoli - A.O. SUN Ospedale dei Colli c/o Seconda Università degli Studi di Napoli Via Costantinopoli, 104 80138 NAPOLI
107	Comitato Etico Campania Sud ASL Napoli 3 Segreteria Tecnico-Scientifica Via Marconi, 66 80049 Torre del Greco (NA)
109	Comitato Etico Campania Sud ASL Napoli 3 Segreteria Tecnico-Scientifica Via Marconi, 66 80049 Torre del Greco (NA)
110	Comitato Etico Campania Centro ASL Napoli 1 Centro Via Comunale del Principe, 13/A 80124 Napoli
111	Comitato Etico Area Vasta Emilia Nord Segreteria Locale di Piacenza P.O. Guglielmo da Saliceto Via Taverna, 49 29121 Piacenza
115	Comitato Etico Area Vasta Emilia Nord Segreteria Locale di Reggio Emilia AUSL - IRCCS di Reggio Emilia Edificio Spallanzani - 1^piano - Infrastruttura, Ricerca e Statistica Viale Umberto I, 50 42123 Reggio Emilia
116	Comitato Etico Area Vasta Emilia Nord Segreteria Locale di Modena Policlinico di Modena Ingresso 3 - Piano Terra - Direzione Assistenza Farmaceutica Via Largo del Pozzo, 71 41124 Modena
166	Comitato Etico Area Vasta Emilia Nord Segreteria Locale di Parma c/o Edificio Cattani - 1^ piano A.O.U. di Parma Via Gramsci, 1 43126 Parma
112	Comitato Etico Area Vasta Emilia Centro Segreteria Locale di Ferrara c/o Ufficio Ricerca Clinica Nuovo Arcispedale Sant'Anna Via Aldo Moro, 8 44124 Cona (FE)
113	Comitato Etico Area Vasta Emilia Centro Policlinico Sant'Orsola Malpighi Via Albertoni, 15 40138 Bologna
114	Comitato Etico Area Vasta Emilia Centro Segreteria Locale AUSL Bologna AUSL di Bologna Via Castiglione, 29 40100 Bologna
117	Comitato Etico Unico Regionale - CEUR IRCCS Centro di Riferimento Oncologico - CRO Via Gallina, 2 33081 Aviano (PN)
118	Comitato Etico dell'Università la Sapienza A.O.U. Policlinico Umberto I Viale del Policlinico, 155 00161 Roma
120	Comitato Etico dell'Università la Sapienza Segreteria Locale A.O. Sant'Andrea Ufficio Sperimentazioni Cliniche Via di Grottarossa, 1035ù 00189 Roma
119	Comitato Etico Centrale IRCCS - Sezione IFO - Fondazione Bietti Istituti Fisioaterapici Ospitalieri - IFO Viale Elio Chianesi, 53 00144 Roma
122	Comitato Etico Indipendente Fondazione PTV Policlinico Tor Vergata Fondazione Policlinico Tor Vergata Viale Oxford, 81 00133 Roma
124	Comitato Etico Liguria Sezione 2 Ospedale Policlinico San Martino Largo Rosanna Benzi, 10 16132 Genova
125	Comitato Etico Milano Area 1 - ASST Sacco Fatebenefratelli Segreteria Locale ASST Santi Paolo e Carlo Via A. di Rudinì, 8 20124 Milano
126	Comitato Etico Pavia Fondazione IRCCS Policlinico San Matteo Viale Camillo Golgi, 19 27100 Pavia
127	Comitato Etico Provincia di Bergamo ASST Papa Giovanni XXIII Piazza OMS, 1 24127 Bergamo
129	Comitato Etico Milano Area 3 Segreteria Comitato Etico ASST Grande Ospedale Metropolitano Nigiarda Piazza Ospedale Maggiore, 3 20162 Milano
134	Comitato Etico Regionale - CER della Marche A.O.U. Ospedali Riuniti di Ancona Via Conca, 71 60126 Torrette di Ancona
137	Comitato Etico Ospedali Riuniti di Foggia AOU Ospedali Riuniti Foggia Viale Luigi Pinto, 1 71122 Foggia
140	Comitato Etico A.O.U. Consorziale Policlinico Servizio Farmacia Piazza Giulio Cesare, 11 70124 Bari
141	Comitato Etico A.O.U. Consorziale Policlinico Servizio Farmacia Piazza Giulio Cesare, 11 70124 Bari
143	Comitato Etico Indipendente dell'A.O.U. di Cagliari Azienda Ospedaliero Universitaria Cagliari Via Ospedale, 54 09124 Cagliari
145	Comitato Etico Interaziendale della Provincia di Messina A.O- Policlinico Universitario “G. Martino” c/o Ufficio Protocollo Generale Via Consolare Valeria n. 1 98125 Gazzi- Messina
146	Comitato Etico Catania, 1 A.O.U. Policlinico "Vittorio Emanuele" Via S. Sofia, 78 95125 Catania
147	Comitato Etico Catania 2 A.O.R.N. Garibaldi Piazza Santa Maria di Gesù, 5 95124 Catania
148	Comitato Etico Palermo 1 A.O.U. Paolo Giaccone Via del Vespro, 129 90127 Palermo
149	Comitato Etico Toscana Area Vasta Sud Est A.O.U. Senese Farmacia Ospedaliera Viale Bracci 16 53100 Siena
151	Comitato Etico Toscana Area Vasta Centro Padiglione 9 Didattica - piano 3 - stanza 228 Nuovo Ingresso Careggi Largo Brambilla, 3 50134 Firenze
162	Comitato Etico Toscana Area Vasta Centro Padiglione 9 Didattica - piano 3 - stanza 228 Nuovo Ingresso Careggi Largo Brambilla, 3 50134 Firenze
152	Comitato Etico toscana Area Vasta Nord-Ovest A.O.U. Careggi Via Roma, 67 56126 Pisa
155	CEAS Umbria Regione Umbria Palazzo Broletto - 3^ piano Via Mario Angeloni, 61 06124 Perugia
157	Comitato Etico dell'Azienda USL della Valle d'Aosta Direzione Area Ospedaliera Ospedale "Umberto Parini" Viale Ginevra, 3 11100 Aosta
158	Comitato Etico per la Sperimentazione Clinica (CESC) delle Province di Verona e Rovigo A.O.U.I. di Verona - Ospedale Borgo Trento c/o Farmacia Ospedaliera Piazzale Stefani, 1 37126 Verona
160	Comitato Etico per la Sperimentazione delle Province di Treviso e Belluno (CESC) U.O.C: Programmazione e Controllo Gestionale ULSS 2 Marca Trevigiana Via Sant'Ambrogio di Fiera, 37 31100 Treviso
161	Comitato Etico per la Sperimentazione Clinica della Provincia di Padova A.O. di Padova Via Nicolò Giustiniani, 1 35128 Padova
163	Comitato Etico della Brianza ASST di Monza Via G.B. Pergolesi, 33 20900 Monza
165	Comitato Etico IRCCS Fondazione Don Carlo Gnocchi Fondazione Don Carlo Gnocchi Via Alfonso Capecelatro, 66 20148 Milano
167	Comitato Etico IRCCS Ospedale San Raffaele Ospedale San Raffaele Via Olgettina, 60 20132 Milano
168	Comitato Etico ATS Sardegna ATS Sardegna - Ospedale Civile Vecchio Via Enrico Costa, 57 07100 Sassari
169	Comitato Etico Fondazione IRCCS Istituto Nazionale dei Tumori Fondazione IRCCS Istituto Nazionale del Tumori Via Venezian, 1 20133 Milano
170	ComitatoEtico Interaziendale A.O. SS Antonio e Biagio e Cesare Arrigo A.O. SS Antonio e Biagio e Cesare Arrigo Via Venezian, 16 15121 Alessandria
